# Supplementary material for: Brønsted Acid‐Catalysed Dehydrative Substitution Reactions of Alcohols
Source: PubMed Central journal article supplement (PMC7820959; doi:10.1002/chem.202002106), 2020-10-15
Supplement: CHEM-27-106-s001.pdf [file CHEM-27-106-s001.pdf]

## **Author Contributions**

S.E. Writing - Original Draft: Supporting.
